# Supplementary material for: Genome-wide genetic structure and differentially selected regions among Landrace, Erhualian, and Meishan pigs using specific-locus amplified fragment sequencing
Source: PubMed Central journal article supplement (PMC5577042; doi:10.1038/s41598-017-09969-6), 2017-08-30
Supplement: 41598_2017_9969_MOESM1_ESM.pdf [file 41598_2017_9969_MOESM1_ESM.pdf]

**Genome-wide genetic structure and differentially selected regions among Landrace, Erhualian, and Meishan pigs using specific-locus amplified fragment sequencing**

**Zhen Li<sup>1</sup>, Shengjuan Wei<sup>1</sup>, Hejun Li<sup>2</sup>, Kelian Wu<sup>3</sup>, Zhaowei Cai<sup>4</sup>, Dongfeng Li<sup>1</sup>, Wei Wei<sup>1</sup>, Qifa Li<sup>1</sup>, Jie Chen<sup>1</sup>, Honglin Liu<sup>1</sup> & Lifan Zhang<sup>1</sup>**

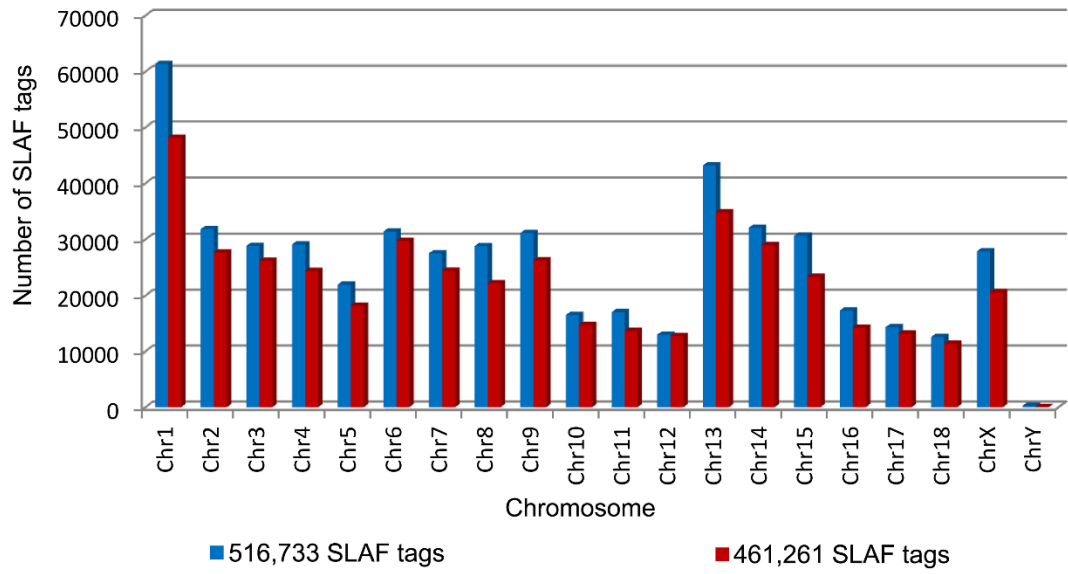

**Supplementary Figure S1. Distributions of SLAF tags on different chromosomes**

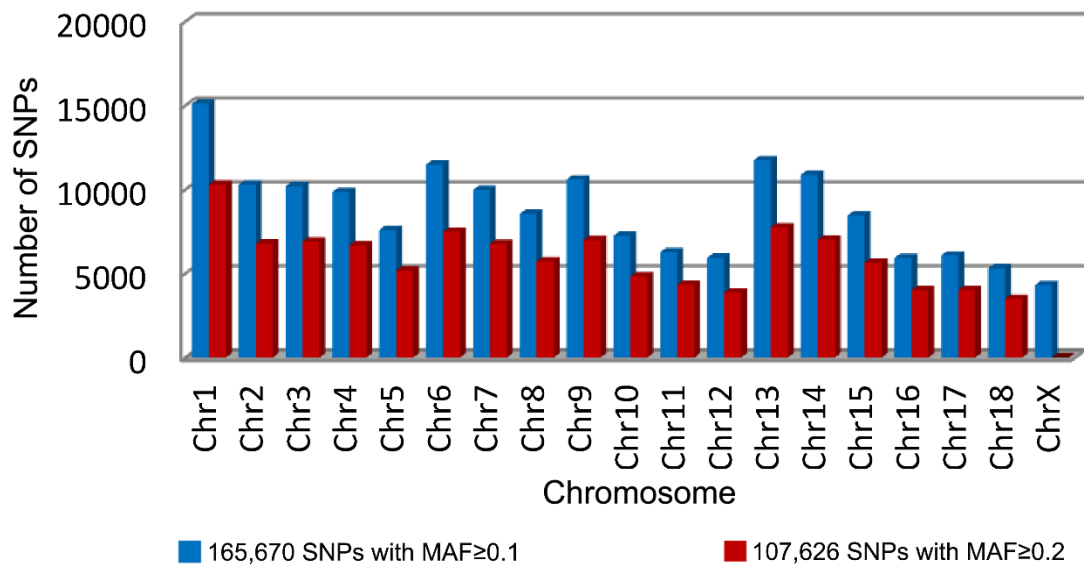

**Supplementary Figure S2. Distributions of SNPs on different chromosomes**

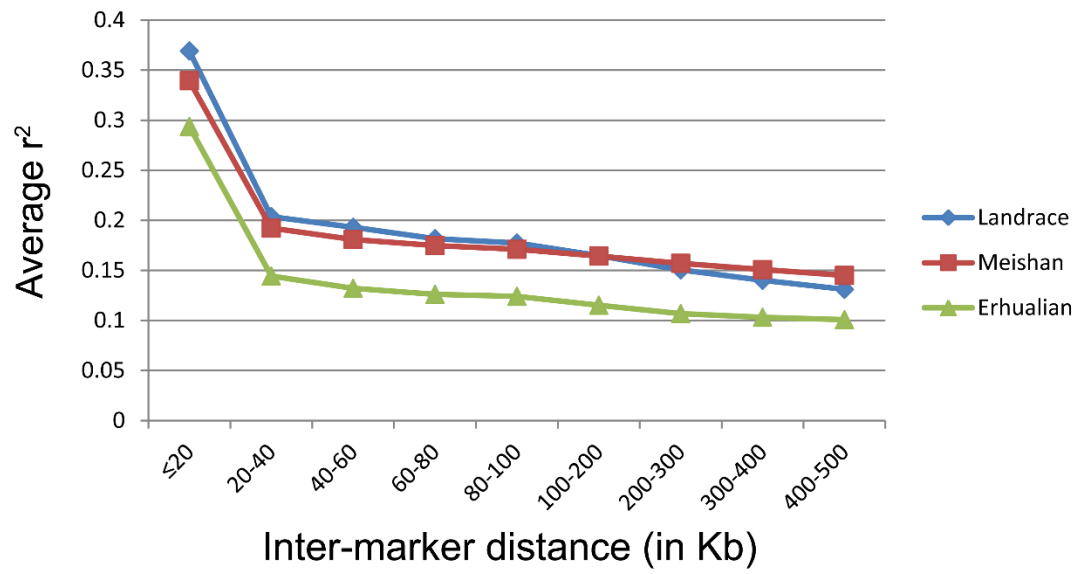

Supplementary Figure S3. Linkage disequilibrium analysis in different pig breeds

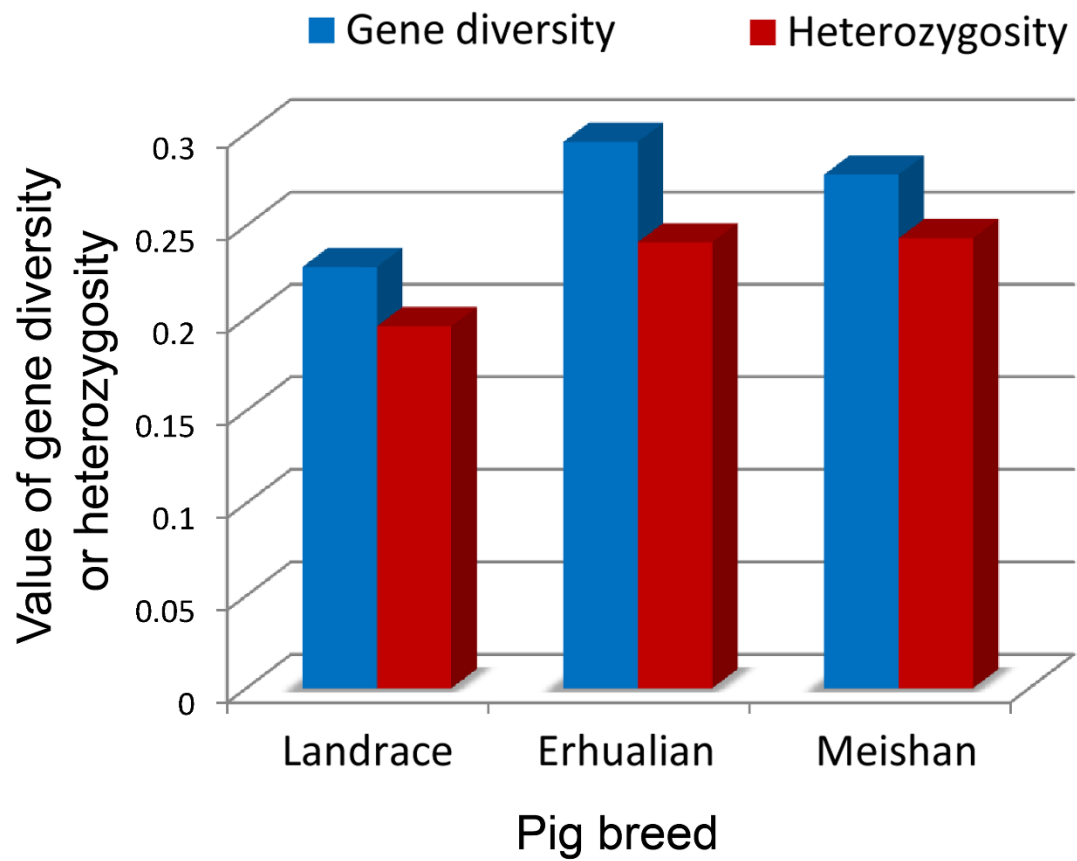

Supplementary Figure S4. Gene diversity and heterozygosity analysis in different pig breeds
